# Supplementary material
Source: MDPI journal article supplement (https://www.mdpi.com/2073-4441/13/21/3123)
Supplement: s1 [file s1]

Table S7. Concentrations of the Yb, Lu, and  $\Sigma$ REE (expressed in mg/kg) in BCR fractions and AR eluates of the tailings sample.

| Yb       |               |               |               |               |       |                              |
|----------|---------------|---------------|---------------|---------------|-------|------------------------------|
| BCR step | BCR1          | BCR2          | BCR3          | BCR4          | ΣBCR  | Control<br><i>aqua regia</i> |
|          | Exchangeable  | Reducible     | Oxidisable    | Residual      |       |                              |
| Site     | mg/kg         |               |               |               |       |                              |
| Tailings | n.d.          | 0.028 ± 0.001 | 0.610 ± 0.038 | 0.466 ± 0.017 | 1.10  | 0.968                        |
| Dust     | 0.170 ± 0.007 | 0.402 ± 0.008 | 0.698 ± 0.024 | 0.499 ± 0.021 | 1.77  | 1.72                         |
| MMART0-3 | n.d.          | n.d.          | 0.367 ± 0.025 | 0.080 ± 0.027 | 0.447 | 0.386                        |
| MMART5-7 | n.d.          | n.d.          | 0.213 ± 0.006 | 0.062 ± 0.001 | 0.275 | 0.382                        |
| MSTUP0-3 | n.d.          | n.d.          | 0.118 ± 0.004 | 0.046 ± 0.065 | 0.166 | 0.220                        |
| Lu       |               |               |               |               |       |                              |
| BCR step | BCR1          | BCR2          | BCR3          | BCR4          | ΣBCR  | Control<br><i>aqua regia</i> |
|          | Exchangeable  | Reducible     | Oxidisable    | Residual      |       |                              |
| Site     | mg/kg         |               |               |               |       |                              |
| Tailings | n.d.          | n.d.          | 0.086 ± 0.002 | 0.066 ± 0.003 | 0.152 | 0.148                        |
| Dust     | 0.010 ± 0.014 | 0.040 ± 0.001 | 0.077 ± 0.002 | 0.054 ± 0.004 | 0.182 | 0.180                        |
| MMART0-3 | n.d.          | n.d.          | 0.051 ± 0.002 | n.d.          | 0.051 | 0.060                        |
| MMART5-7 | n.d.          | n.d.          | 0.033 ± 0.005 | n.d.          | 0.033 | 0.051                        |
| MSTUP0-3 | n.d.          | n.d.          | n.d.          | n.d.          | n.d.  | n.d.                         |
| ΣREE     |               |               |               |               |       |                              |
| BCR step | BCR1          | BCR2          | BCR3          | BCR4          | ΣBCR  | Control <i>aqua regia</i>    |
|          | Exchangeable  | Reducible     | Oxidisable    | Residual      |       |                              |
| Site     | mg/kg         |               |               |               |       |                              |
| Tailings | 0.080         | 2.55          | 45.5          | 59.4          | 107   | 91.3                         |
| Dust     | 7.44          | 22.7          | 31.8          | 34.0          | 95.9  | 88.3                         |
| MMART0-3 | n.d.          | 0.012         | 31.7          | 13.4          | 45.1  | 36.7                         |
| MMART5-7 | n.d.          | 0.177         | 18.8          | 9.23          | 28.3  | 36.9                         |
| MSTUP0-3 | 0.006         | 0.084         | 14.1          | 10.1          | 24,4  | 23.0                         |

\*n.d. – not detected
