# Supplementary material
Source: MDPI journal article supplement (https://www.mdpi.com/2073-4441/13/21/3123)
Supplement: s1 [file s1]

Table S4. Concentrations of the La, Ce, Pr, and Nd (expressed in mg/kg) in BCR fractions and AR eluates of the tailings sample.

| La       |               |               |               |               |      |                           |
|----------|---------------|---------------|---------------|---------------|------|---------------------------|
| BCR step | BCR1          | BCR2          | BCR3          | BCR4          | ΣBCR | Control <i>aqua regia</i> |
|          | Exchangeable  | Reducible     | Oxidisable    | Residual      |      |                           |
| Site     | mg/kg         |               |               |               |      |                           |
| Tailings | n.d.          | 0.580 ± 0.026 | 8.51 ± 0.08   | 9.49 ± 0.20   | 18.6 | 15.4                      |
| Dust     | 1.45 ± 0.09   | 4.23 ± 0.02   | 4.93 ± 0.03   | 4.87 ± 0.14   | 15.5 | 13.1                      |
| MMART0-3 | n.d.          | n.d.          | 5.33 ± 0.01   | 2.45 ± 0.64   | 7.78 | 6.32                      |
| MMART5-7 | n.d.          | 0.060 ± 0.010 | 3.17 ± 0.24   | 1.86 ± 0.02   | 5.09 | 6.53                      |
| MSTUP0-3 | n.d.          | 0.029 ± 0.003 | 2.70 ± 0.01   | 1.72 ± 0.14   | 4.45 | 4.04                      |
| Ce       |               |               |               |               |      |                           |
| BCR step | BCR1          | BCR2          | BCR3          | BCR4          | ΣBCR | Control <i>aqua regia</i> |
|          | Exchangeable  | Reducible     | Oxidisable    | Residual      |      |                           |
| Site     | mg/kg         |               |               |               |      |                           |
| Tailings | n.d.          | 0.709 ± 0.040 | 11.4 ± 0.298  | 24.3 ± 0.4    | 36.4 | 30.7                      |
| Dust     | 1.23 ± 1.74   | 7.93 ± 0.01   | 8.85 ± 0.01   | 11.8 ± 0.5    | 29.9 | 27.7                      |
| MMART0-3 | n.d.          | n.d.          | 9.76 ± 0.02   | 4.46 ± 1.21   | 14.2 | 11.4                      |
| MMART5-7 | n.d.          | 0.049 ± 0.010 | 5.71 ± 0.53   | 3.23 ± 0.05   | 8.99 | 11.6                      |
| MSTUP0-3 | n.d.          | 0.013 ± 0.018 | 4.51 ± 0.03   | 3.24 ± 0.27   | 7.76 | 7.04                      |
| Pr       |               |               |               |               |      |                           |
| BCR step | BCR1          | BCR2          | BCR3          | BCR4          | ΣBCR | Control <i>aqua regia</i> |
|          | Exchangeable  | Reducible     | Oxidisable    | Residual      |      |                           |
| Site     | mg/kg         |               |               |               |      |                           |
| Tailings | n.d.          | 0.076 ± 0.005 | 2.00 ± 0.02   | 2.20 ± 0.05   | 4.28 | 3.53                      |
| Dust     | 0.329 ± 0.029 | 0.792 ± 0.019 | 1.18 ± 0.03   | 1.20 ± 0.06   | 3.49 | 3.20                      |
| MMART0-3 | n.d.          | n.d.          | 1.29 ± 0.00   | 0.582 ± 0.140 | 1.87 | 1.51                      |
| MMART5-7 | n.d.          | n.d.          | 0.771 ± 0.096 | 0.393 ± 0.007 | 1.16 | 1.52                      |
| MSTUP0-3 | n.d.          | n.d.          | 0.622 ± 0.006 | 0.517 ± 0.056 | 1.14 | 1.02                      |
| Nd       |               |               |               |               |      |                           |
| BCR step | BCR1          | BCR2          | BCR3          | BCR4          | ΣBCR | Control <i>aqua regia</i> |
|          | Exchangeable  | Reducible     | Oxidisable    | Residual      |      |                           |
| Site     | mg/kg         |               |               |               |      |                           |
| Tailings | 0.028 ± 0.005 | 0.307 ± 0.051 | 7.86 ± 0.01   | 8.03 ± 0.02   | 16.2 | 13.6                      |
| Dust     | 1.45 ± 0.15   | 2.95 ± 0.01   | 4.70 ± 0.22   | 4.71 ± 0.40   | 13.8 | 12.8                      |
| MMART0-3 | n.d.          | n.d.          | 5.17 ± 0.04   | 2.21 ± 0.61   | 7.38 | 5.90                      |
| MMART5-7 | n.d.          | 0.021 ± 0.001 | 3.05 ± 0.29   | 1.42 ± 0.03   | 4.49 | 5.74                      |
| MSTUP0-3 | n.d.          | n.d.          | 2.38 ± 0.03   | 1.76 ± 0.20   | 4.14 | 3.72                      |

\*n.d. – not detected
