# Supplementary material
Source: MDPI journal article supplement (https://www.mdpi.com/2073-4441/13/21/3123)
Supplement: s1 [file s1]

Table S8. Concentrations of different elements provided by total analysis using lithium borate fusion. Data are given in mg/kg.

| Analyte     | MDL  | Tailings |             |             |          |                          |
|-------------|------|----------|-------------|-------------|----------|--------------------------|
|             |      | Dust     | Beige glass | Green glass | Tailings | Metallic lustre material |
| <b>Cu</b>   | 0.1  | 230.5    | 3.7         | 6           | 546.1    | 12.2                     |
| <b>Pb</b>   | 0.1  | 468.3    | 0.7         | 0.3         | 662.5    | 13.9                     |
| <b>Zn</b>   | 1    | 1899     | 5           | 2           | 515      | 5                        |
| <b>Ni</b>   | 0.1  | 142.8    | 1.1         | 2.9         | 130.4    | 2.6                      |
| <b>Co</b>   | 0.2  | 64.4     | 0.5         | 0.9         | 27       | 2.2                      |
| <b>Th</b>   | 0.2  | 3.1      | 6.9         | 17.4        | 8.5      | n.d.                     |
| <b>U</b>    | 0.1  | 3.1      | 18.3        | 22          | 27.2     | 1.1                      |
| <b>Y</b>    | 0.1  | 18.4     | 88.2        | 129.9       | 22.4     | 1.1                      |
| <b>La</b>   | 0.1  | 18.1     | 120.7       | 122.8       | 28.8     | 0.8                      |
| <b>Ce</b>   | 0.1  | 34.9     | 154.4       | 254.5       | 55.1     | 1.3                      |
| <b>Pr</b>   | 0.02 | 3.96     | 22.86       | 28.13       | 6.3      | 0.15                     |
| <b>Nd</b>   | 0.3  | 14.6     | 87.9        | 107         | 23.2     | 0.7                      |
| <b>Sm</b>   | 0.05 | 3.25     | 17.34       | 21.8        | 4.41     | 0.09                     |
| <b>Eu</b>   | 0.02 | 0.8      | n.d.        | 4.95        | 0.98     | 0.04                     |
| <b>Gd</b>   | 0.05 | 3.09     | 20.1        | 22.5        | 4.1      | 0.18                     |
| <b>Tb</b>   | 0.01 | 0.47     | 2.8         | 3.4         | 0.62     | 0.02                     |
| <b>Dy</b>   | 0.05 | 3        | 16.5        | 21.6        | 3.8      | 0.15                     |
| <b>Ho</b>   | 0.02 | 0.62     | 2.9         | 4.2         | 0.75     | 0.03                     |
| <b>Er</b>   | 0.03 | 1.8      | 8.2         | 11.9        | 2.1      | 0.1                      |
| <b>Tm</b>   | 0.01 | 0.26     | 1.1         | 1.7         | 0.29     | 0.01                     |
| <b>Yb</b>   | 0.05 | 2.1      | 6.1         | 9.8         | 2        | 0.08                     |
| <b>Lu</b>   | 0.01 | 0.23     | 1           | 1.5         | 0.29     | 0.01                     |
| <b>ΣREE</b> |      | 106      | 550         | 746         | 155      | 4.76                     |

\*n.d. – not detected
