# Supplementary material
Source: MDPI journal article supplement (https://www.mdpi.com/2073-4441/13/21/3123)
Supplement: s1 [file s1]

Table S5. Concentrations of the Sm, Eu, Gd, and Tb (expressed in mg/kg) in BCR fractions and AR eluates of the tailings sample.

| Sm       |               |               |               |               |       |                   |
|----------|---------------|---------------|---------------|---------------|-------|-------------------|
| BCR step | BCR1          | BCR2          | BCR3          | BCR4          | ΣBCR  | Control           |
|          | Exchangeable  | Reducible     | Oxidisable    | Residual      |       | <i>aqua regia</i> |
| Site     | mg/kg         |               |               |               |       |                   |
| Tailings | n.d.          | 0.053 ± 0.002 | 1.77 ± 0.04   | 1.62 ± 0.03   | 3.45  | 2.95              |
| Dust     | 0.375 ± 0.027 | 0.649 ± 0.034 | 1.17 ± 0.02   | 0.999 ± 0.109 | 3.19  | 3.01              |
| MMART0-3 | n.d.          | n.d.          | 1.10 ± 0.03   | 0.458 ± 0.142 | 1.55  | 1.22              |
| MMART5-7 | n.d.          | n.d.          | 0.653 ± 0.064 | 0.265 ± 0.010 | 0.918 | 1.23              |
| MSTUP0-3 | n.d.          | n.d.          | 0.481 ± 0.015 | 0.394 ± 0.034 | 0.876 | 0.858             |
| Eu       |               |               |               |               |       |                   |
| BCR step | BCR1          | BCR2          | BCR3          | BCR4          | ΣBCR  | Control           |
|          | Exchangeable  | Reducible     | Oxidisable    | Residual      |       | <i>aqua regia</i> |
| Site     | mg/kg         |               |               |               |       |                   |
| Tailings | n.d.          | 0.145 ± 0.000 | 0.431 ± 0.022 | 0.404 ± 0.002 | 0.981 | 0.667             |
| Dust     | 0.097 ± 0.006 | 0.179 ± 0.008 | 0.312 ± 0.021 | 0.322 ± 0.018 | 0.910 | 0.754             |
| MMART0-3 | n.d.          | n.d.          | 0.239 ± 0.002 | 0.152 ± 0.058 | 0.391 | 0.255             |
| MMART5-7 | n.d.          | n.d.          | 0.147 ± 0.008 | 0.125 ± 0.022 | 0.273 | 0.272             |
| MSTUP0-3 | n.d.          | n.d.          | 0.102 ± 0.000 | 0.033 ± 0.047 | 0.137 | 0.173             |
| Gd       |               |               |               |               |       |                   |
| BCR step | BCR1          | BCR2          | BCR3          | BCR4          | ΣBCR  | Control           |
|          | Exchangeable  | Reducible     | Oxidisable    | Residual      |       | <i>aqua regia</i> |
| Site     | mg/kg         |               |               |               |       |                   |
| Tailings | n.d.          | 0.033 ± 0.002 | 0.808 ± 0.015 | 0.723 ± 0.001 | 1.57  | 1.27              |
| Dust     | 0.079 ± 0.112 | 0.300 ± 0.003 | 0.495 ± 0.021 | 0.427 ± 0.011 | 1.30  | 1.29              |
| MMART0-3 | n.d.          | n.d.          | 0.504 ± 0.005 | 0.164 ± 0.054 | 0.668 | 0.521             |
| MMART5-7 | n.d.          | n.d.          | 0.306 ± 0.012 | 0.113 ± 0.002 | 0.419 | 0.536             |
| MSTUP0-3 | n.d.          | n.d.          | 0.219 ± 0.002 | 0.151 ± 0.023 | 0.371 | 0.350             |
| Tb       |               |               |               |               |       |                   |
| BCR step | BCR1          | BCR2          | BCR3          | BCR4          | ΣBCR  | Control           |
|          | Exchangeable  | Reducible     | Oxidisable    | Residual      |       | <i>aqua regia</i> |
| Site     | mg/kg         |               |               |               |       |                   |
| Tailings | n.d.          | n.d.          | 0.226 ± 0.003 | 0.187 ± 0.004 | 0.413 | 0.387             |
| Dust     | 0.040 ± 0.003 | 0.087 ± 0.000 | 0.149 ± 0.000 | 0.128 ± 0.014 | 0.404 | 0.365             |
| MMART0-3 | n.d.          | n.d.          | 0.148 ± 0.001 | n.d.          | 0.148 | 0.160             |
| MMART5-7 | n.d.          | n.d.          | 0.084 ± 0.010 | n.d.          | 0.084 | 0.155             |
| MSTUP0-3 | n.d.          | n.d.          | 0.058 ± 0.002 | n.d.          | 0.059 | 0.101             |

\*n.d. – not detected
