# Supplementary material
Source: MDPI journal article supplement (https://www.mdpi.com/2073-4441/13/21/3123)
Supplement: s1 [file s1]

Table S6. Concentrations of the Dy, Ho, Er, and Tm (expressed in mg/kg) in BCR fractions and AR eluates of the tailings sample.

| Dy       |               |               |               |               |       |                              |
|----------|---------------|---------------|---------------|---------------|-------|------------------------------|
| BCR step | BCR1          | BCR2          | BCR3          | BCR4          | ΣBCR  | Control<br><i>aqua regia</i> |
|          | Exchangeable  | Reducible     | Oxidisable    | Residual      |       |                              |
| Site     | mg/kg         |               |               |               |       |                              |
| Tailings | n.d.          | 0.048 ± 0.002 | 1.297 ± 0.001 | 1.002 ± 0.004 | 2.35  | 2.13                         |
| Dust     | 0.239 ± 0.001 | 0.562 ± 0.010 | 0.950 ± 0.032 | 0.766 ± 0.061 | 2.52  | 2.35                         |
| MMART0-3 | n.d.          | n.d.          | 0.803 ± 0.005 | 0.210 ± 0.062 | 1.01  | 0.888                        |
| MMART5-7 | n.d.          | n.d.          | 0.490 ± 0.056 | 0.140 ± 0.014 | 0.629 | 0.846                        |
| MSTUP0-3 | n.d.          | n.d.          | 0.316 ± 0.003 | 0.258 ± 0.029 | 0.575 | 0.575                        |
| Ho       |               |               |               |               |       |                              |
| BCR step | BCR1          | BCR2          | BCR3          | BCR4          | ΣBCR  | Control<br><i>aqua regia</i> |
|          | Exchangeable  | Reducible     | Oxidisable    | Residual      |       |                              |
| Site     | mg/kg         |               |               |               |       |                              |
| Tailings | n.d.          | n.d.          | 0.255 ± 0.004 | 0.191 ± 0.005 | 0.446 | 0.413                        |
| Dust     | 0.047 ± 0.003 | 0.118 ± 0.005 | 0.198 ± 0.011 | 0.149 ± 0.013 | 0.512 | 0.498                        |
| MMART0-3 | n.d.          | n.d.          | 0.160 ± 0.002 | n.d.          | 0.160 | 0.175                        |
| MMART5-7 | n.d.          | n.d.          | 0.094 ± 0.008 | n.d.          | 0.094 | 0.172                        |
| MSTUP0-3 | n.d.          | n.d.          | 0.055 ± 0.001 | n.d.          | 0.056 | 0.115                        |
| Er       |               |               |               |               |       |                              |
| BCR step | BCR1          | BCR2          | BCR3          | BCR4          | ΣBCR  | Control<br><i>aqua regia</i> |
|          | Exchangeable  | Reducible     | Oxidisable    | Residual      |       |                              |
| Site     | mg/kg         |               |               |               |       |                              |
| Tailings | n.d.          | 0.029 ± 0.003 | 0.723 ± 0.019 | 0.509 ± 0.002 | 1.26  | 1.16                         |
| Dust     | 0.135 ± 0.010 | 0.353 ± 0.023 | 0.554 ± 0.004 | 0.451 ± 0.015 | 1.49  | 1.45                         |
| MMART0-3 | n.d.          | n.d.          | 0.468 ± 0.014 | 0.114 ± 0.038 | 0.581 | 0.490                        |
| MMART5-7 | n.d.          | n.d.          | 0.274 ± 0.020 | 0.080 ± 0.002 | 0.354 | 0.477                        |
| MSTUP0-3 | n.d.          | n.d.          | 0.157 ± 0.008 | 0.140 ± 0.005 | 0.298 | 0.280                        |
| Tm       |               |               |               |               |       |                              |
| BCR step | BCR1          | BCR2          | BCR3          | BCR4          | ΣBCR  | Control<br><i>aqua regia</i> |
|          | Exchangeable  | Reducible     | Oxidisable    | Residual      |       |                              |
| Site     | mg/kg         |               |               |               |       |                              |
| Tailings | n.d.          | n.d.          | 0.098 ± 0.001 | 0.073 ± 0.000 | 0.171 | 0.159                        |
| Dust     | 0.010 ± 0.015 | 0.051 ± 0.002 | 0.089 ± 0.001 | 0.071 ± 0.003 | 0.221 | 0.219                        |
| MMART0-3 | n.d.          | n.d.          | 0.059 ± 0.002 | n.d.          | 0.059 | 0.066                        |
| MMART5-7 | n.d.          | n.d.          | 0.037 ± 0.006 | n.d.          | 0.037 | 0.065                        |
| MSTUP0-3 | n.d.          | n.d.          | n.d.          | n.d.          | n.d.  | n.d.                         |

n.d. – not detected
