# Supplementary material
Source: MDPI journal article supplement (https://www.mdpi.com/2073-4441/13/21/3123)
Supplement: s1 [file s1]

Table S1. Concentrations of the Mn, Fe, Co, and Ni (expressed in mg/kg) in BCR fractions and AR eluates of the tailings sample.

| Mn       |               |               |               |               |        |                           |
|----------|---------------|---------------|---------------|---------------|--------|---------------------------|
| BCR step | BCR1          | BCR2          | BCR3          | BCR4          | ΣBCR   | Control <i>aqua regia</i> |
|          | Exchangeable  | Reducible     | Oxidisable    | Residual      |        |                           |
| Site     | mg/kg         |               |               |               |        |                           |
| Tailings | 221 ± 5       | 17160 ± 198   | 1137 ± 3      | 4595 ± 58     | 23112  | 20304                     |
| Dust     | 62339 ± 527   | 73639 ± 1046  | 53192 ± 993   | 67250 ± 3064  | 256420 | 241492                    |
| MMART0-3 | 65.2 ± 0.45   | 114 ± 4       | 282 ± 11      | 38.2 ± 15.1   | 500    | 462                       |
| MMART5-7 | 211 ± 10      | 491 ± 1       | 555 ± 73      | 141 ± 49      | 1398   | 1589                      |
| MSTUP0-3 | 15.0 ± 0.3    | 15.8 ± 2.6    | 8.77 ± 3.93   | 5.66 ± 12.76  | 45.3   | 43.2                      |
| Fe       |               |               |               |               |        |                           |
| BCR step | BCR1          | BCR2          | BCR3          | BCR4          | ΣBCR   | Control <i>aqua regia</i> |
|          | Exchangeable  | Reducible     | Oxidisable    | Residual      |        |                           |
| Site     | mg/kg         |               |               |               |        |                           |
| Tailings | n.d.          | 1466 ± 34     | 629 ± 6       | 34436 ± 385   | 36530  | 31821                     |
| Dust     | 340 ± 19      | 5880 ± 76     | 6309 ± 138    | 36835 ± 925   | 49364  | 45009                     |
| MMART0-3 | n.d.          | 45.5 ± 13.7   | 7092 ± 25     | 8920 ± 1980   | 16056  | 14396                     |
| MMART5-7 | n.d.          | 129 ± 9       | 4705 ± 1095   | 10123 ± 587   | 14955  | 22736                     |
| MSTUP0-3 | n.d.          | 21.4 ± 1.0    | 353 ± 1       | 2863 ± 487    | 3236   | 3658                      |
| Co       |               |               |               |               |        |                           |
| BCR step | BCR1          | BCR2          | BCR3          | BCR4          | ΣBCR   | Control <i>aqua regia</i> |
|          | Exchangeable  | Reducible     | Oxidisable    | Residual      |        |                           |
| Site     | mg/kg         |               |               |               |        |                           |
| Tailings | 0.030 ± 0.007 | 8.51 ± 0.22   | 3.07 ± 0.03   | 11.0 ± 0.2    | 23.6   | 20.1                      |
| Dust     | 9.70 ± 0.20   | 12.8 ± 0.07   | 12.6 ± 0.1    | 26.9 ± 0.4    | 62.0   | 56.7                      |
| MMART0-3 | 0.728±0.005   | n.d.          | 3.89 ± 0.02   | 1.61 ± 0.36   | 6.23   | 5.69                      |
| MMART5-7 | 0.448 ± 0.017 | 0.013 ± 0.018 | 2.40 ± 0.13   | 1.13 ± 0.03   | 3.99   | 5.93                      |
| MSTUP0-3 | 0.073 ± 0.002 | n.d.          | 0.208 ± 0.005 | 0.817 ± 0.140 | 1.10   | 1.19                      |
| Ni       |               |               |               |               |        |                           |
| BCR step | BCR1          | BCR2          | BCR3          | BCR4          | ΣBCR   | Control <i>aqua regia</i> |
|          | Exchangeable  | Reducible     | Oxidisable    | Residual      |        |                           |
| Site     | mg/kg         |               |               |               |        |                           |
| Tailings | 0.803 ± 0.018 | 24.4 ± 0.6    | 10.5 ± 0.2    | 121 ± 1       | 157    | 142                       |
| Dust     | 21.2 ± 0.81   | 34.3 ± 0.5    | 37.6 ± 1.3    | 104 ± 1       | 197    | 182                       |
| MMART0-3 | 1.77 ± 0.02   | 0.367 ± 0.023 | 15.9 ± 0.2    | 22.9 ± 4.9    | 40.9   | 37.6                      |
| MMART5-7 | 2.69 ± 0.16   | 0.984 ± 0.036 | 8.57 ± 0.74   | 13.5 ± 0.4    | 25.8   | 36.6                      |
| MSTUP0-3 | 0.437 ± 0.033 | n.d.          | 1.91 ± 0.20   | 8.34 ± 1.40   | 10.6   | 11.6                      |

\*n.d. – not detected
