# Supplementary material
Source: MDPI journal article supplement (https://www.mdpi.com/2073-4441/13/21/3123)
Supplement: s1 [file s1]

Table S2. Concentrations of the Pb, Al, P, and Cr (expressed in mg/kg) in BCR fractions and AR eluates of the tailings sample.

| Pb       |               |               |             |             |       |                           |
|----------|---------------|---------------|-------------|-------------|-------|---------------------------|
| BCR step | BCR1          | BCR2          | BCR3        | BCR4        | ΣBCR  | Control <i>aqua regia</i> |
|          | Exchangeable  | Reducible     | Oxidisable  | Residual    |       |                           |
| Site     | mg/kg         |               |             |             |       |                           |
| Tailings | 0.023 ± 0.040 | 93.9 ± 3.5    | 322 ± 0.1   | 258 ± 6     | 675   | 595                       |
| Dust     | 6.94 ± 0.21   | 27.6 ± 3.3    | 209 ± 4.2   | 296 ± 9     | 540   | 490                       |
| MMART0-3 | 0.560 ± 0.091 | 2.44 ± 0.99   | 182 ± 9.3   | 85.4 ± 9.1  | 271   | 238                       |
| MMART5-7 | 1.25 ± 0.01   | 8.12 ± 0.59   | 75.2 ± 33.4 | 76.6 ± 38.2 | 161   | 236                       |
| MSTUP0-3 | n.d.          | 0.574 ± 0.013 | 16.0 ± 0.7  | 6.24 ± 1.97 | 22.8  | 22.8                      |
| Al       |               |               |             |             |       |                           |
| BCR step | BCR1          | BCR2          | BCR3        | BCR4        | ΣBCR  | Control <i>aqua regia</i> |
|          | Exchangeable  | Reducible     | Oxidisable  | Residual    |       |                           |
| Site     | mg/kg         |               |             |             |       |                           |
| Tailings | 1.11 ± 1.12   | 763 ± 29      | 6676 ± 50   | 17131 ± 269 | 24570 | 22965                     |
| Dust     | 548 ± 69      | 79.3 ± 3.2    | 9569 ± 91   | 12341 ± 88  | 22537 | 22017                     |
| MMART0-3 | n.d.          | 2.30 ± 0.03   | 2908 ± 25   | 5575 ± 1474 | 8485  | 7400                      |
| MMART5-7 | n.d.          | 6.71 ± 1.65   | 1519 ± 279  | 3425 ± 89   | 4952  | 7117                      |
| MSTUP0-3 | n.d.          | 5.74 ± 0.68   | 338 ± 9     | 2733 ± 299  | 3076  | 4024                      |
| P        |               |               |             |             |       |                           |
| BCR step | BCR1          | BCR2          | BCR3        | BCR4        | ΣBCR  | Control <i>aqua regia</i> |
|          | Exchangeable  | Reducible     | Oxidisable  | Residual    |       |                           |
| Site     | mg/kg         |               |             |             |       |                           |
| Tailings | 5.97 ± 0.14   | n.d.          | 215 ± 1     | 562. ± 5    | 364   | 703                       |
| Dust     | 47.1 ± 49.8   | n.d.          | 153 ± 2     | 1020 ± 252  | 800   | 921                       |
| MMART0-3 | 3.56 ± 0.33   | n.d.          | n.d.        | 929 ± 191   | 512   | 770                       |
| MMART5-7 | 5.98 ± 0.20   | n.d.          | n.d.        | 789 ± 38    | 291   | 1057                      |
| MSTUP0-3 | 28.9 ± 2.4    | n.d.          | 164 ± 1     | 92.3 ± 9.2  |       | 324                       |
| Cr       |               |               |             |             |       |                           |
| BCR step | BCR1          | BCR2          | BCR3        | BCR4        | ΣBCR  | Control <i>aqua regia</i> |
|          | Exchangeable  | Reducible     | Oxidisable  | Residual    |       |                           |
| Site     | mg/kg         |               |             |             |       |                           |
| Tailings | 0.438 ± 0.015 | 0.247 ± 0.049 | 22.7 ± 0.2  | 81.0 ± 0.0  | 104   | 95                        |
| Dust     | 0.553 ± 0.042 | 0.103 ± 0.010 | 25.2 ± 0.6  | 98.8 ± 0.7  | 125   | 121                       |
| MMART0-3 | n.d.          | 0.085 ± 0.007 | 21.1 ± 0.1  | 32.7 ± 6.8  | 54    | 50                        |
| MMART5-7 | n.d.          | 0.353 ± 0.003 | 10.1 ± 1.0  | 22.6 ± 0.6  | 33    | 50                        |
| MSTUP0-3 | 0.002 ± 0.002 | n.d.          | 3.28 ± 0.02 | 8.25 ± 1.28 | 12.5  | 13.6                      |

\*n.d. – not detected
