# Supplementary material
Source: MDPI journal article supplement (https://www.mdpi.com/2073-4441/13/21/3123)
Supplement: s1 [file s1]

Table S3. Concentrations of the Cu, Zn, Sc, and Y (expressed in mg/kg) in BCR fractions and AR eluates of the tailings sample.

| Cu       |               |               |               |               |      |                           |
|----------|---------------|---------------|---------------|---------------|------|---------------------------|
| BCR step | BCR1          | BCR2          | BCR3          | BCR4          | ΣBCR | Control <i>aqua regia</i> |
|          | Exchangeable  | Reducible     | Oxidisable    | Residual      |      |                           |
| Site     | mg/kg         |               |               |               |      |                           |
| Tailings | 2.89 ± 0.04   | 42.5 ± 1.0    | 247 ± 4       | n.d.          | 292  | n.d.                      |
| Dust     | 1.99 ± 0.31   | n.d.          | 46.6 ± 0.6    | n.d.          | 48.6 | n.d.                      |
| MMART0-3 | n.d.          | n.d.          | 121 ± 1       | n.d.          | 121  | n.d.                      |
| MMART5-7 | 1.59 ± 0.01   | n.d.          | 152 ± 11      | n.d.          | 154  | n.d.                      |
| MSTUP0-3 | n.d.          | n.d.          | 20.8 ± 0.2    | n.d.          | 20.8 | n.d.                      |
| Zn       |               |               |               |               |      |                           |
| BCR step | BCR1          | BCR2          | BCR3          | BCR4          | ΣBCR | Control <i>aqua regia</i> |
|          | Exchangeable  | Reducible     | Oxidisable    | Residual      |      |                           |
| Site     | mg/kg         |               |               |               |      |                           |
| Tailings | 5.27 ± 4.74   | 217 ± 1       | 106 ± 1       | 225 ± 7       | 553  | 494                       |
| Dust     | 575 ± 94      | 868 ± 29      | 407 ± 1       | 513 ± 0       | 2363 | 2158                      |
| MMART0-3 | 15.3 ± 0.7    | 36.5 ± 0.4    | 154 ± 10      | 20.6 ± 10.5   | 226  | 217                       |
| MMART5-7 | 56.3 ± 0.4    | 89.9 ± 1.8    | 93.2 ± 16.3   | 19.7 ± 0.6    | 259  | 315                       |
| MSTUP0-3 | 0.811 ± 2.41  | 7.76 ± 0.13   | 15.4 ± 1.3    | 8.69 ± 11.60  | 32.7 | 39.2                      |
| Sc       |               |               |               |               |      |                           |
| BCR step | BCR1          | BCR2          | BCR3          | BCR4          | ΣBCR | Control <i>aqua regia</i> |
|          | Exchangeable  | Reducible     | Oxidisable    | Residual      |      |                           |
| Site     | mg/kg         |               |               |               |      |                           |
| Tailings | n.d.          | n.d.          | 0.805 ± 0.010 | 4.97 ± 0.05   | 5.77 | 5.06                      |
| Dust     | 0.072±0.002   | n.d.          | 1.80 ± 0.01   | 3.09 ± 0.06   | 4.96 | 4.84                      |
| MMART0-3 | n.d.          | 0.012 ± 0.016 | 0.876 ± 0.002 | 1.39 ± 0.35   | 2.28 | 1.35                      |
| MMART5-7 | n.d.          | 0.011 ± 0.015 | 0.492 ± 0.061 | 0.730 ± 0.011 | 1.23 | 1.39                      |
| MSTUP0-3 | 0.006 ± 0.009 | 0.013 ± 0.019 | 0.163 ± 0.008 | 0.505 ± 0.032 | 0.69 | 0.620                     |
| Y        |               |               |               |               |      |                           |
| BCR step | BCR1          | BCR2          | BCR3          | BCR4          | ΣBCR | Control <i>aqua regia</i> |
|          | Exchangeable  | Reducible     | Oxidisable    | Residual      |      |                           |
| Site     | mg/kg         |               |               |               |      |                           |
| Tailings | 0.049 ± 0.001 | 0.537 ± 0.021 | 8.63 ± 0.15   | 5.17 ± 0.04   | 14.4 | 12.8                      |
| Dust     | 1.70 ± 0.09   | 4.03 ± 0.02   | 5.66 ± 0.15   | 4.40 ± 0.18   | 15.8 | 14.8                      |
| MMART0-3 | n.d.          | n.d.          | 5.39 ± 0.04   | 1.12 ± 0.30   | 6.51 | 6.00                      |
| MMART5-7 | n.d.          | 0.036 ± 0.008 | 3.33 ± 0.30   | 0.811 ± 0.033 | 4.17 | 5.89                      |
| MSTUP0-3 | n.d.          | 0.029 ± 0.003 | 2.27 ± 0.04   | 1.33 ± 0.09   | 3.63 | 3.86                      |

\*n.d. – not detected
